# Supplementary material
Source: MDPI journal article supplement (https://www.mdpi.com/2077-0472/11/9/830)
Supplement: s1 [file s1]

Archive with 2 entries (2 files):
- CoverCrops_Data.xls
- Wagg_Aug19_SupMat.pdf
