# Supplementary material
Source: MDPI journal article supplement (https://www.mdpi.com/2077-0472/11/9/830)
Supplement: s1 [file s1 › CoverCrops_Data.xls]

## Sheet: MetaData
Variable Name	Description
PlotID	Unique plot code
Field	Field 1 or field 2
Block	Block within field. Not blocks 1 and 2 are in Field 1 and blocks 3 and 4 are in Field 2
CCID	Identity code of cover crop composition
fgID	Crop functional group identity
FieldPositionX	position along the with of the blocks of the plots in m from the bottom corner of the field
FieldPositionY	position along the with of the blocks of the plots in m from the bottom corner of the field
CoverCrop	Name of cover crop
NH4ppm	KCl extraxted soil ammonium
NO3ppm	KCl extraxted soil nitrate
SoilN.pct	Total soil N in %
SoilP.ppm	Total soil P in ppm
SoilK.meq	Total soil K in meq
SoilC.pct	Total soil C om %
RootDen_gcm3	Rooting density in g per cm3
CropBM	Total aboveground crop biomass in kg per m2
WeedBM	Total aboveground weed biomass in kg per m2
reads.ITS	Total number of IST (fungal) MiSeq reads per plot
fungalRich	Number of unique fungal ASVs
fungalEven	Pielou J evenness among fungi using log(x+1) transformed number of sequence reads
AMF	Number of sequence reads assigned to arbuscular mycorrhizal fungi taxonomy
potential.pathogen	Number of sequence reads assigned to fungal taxa that may be associated as a plant pathogen usning FUNGuild
saprotroph	Number of sequence reads assigned to fungal taxa that may be associated as a saprotroph usning FUNGuild
even.16S	Pielou J evenness among bacteria using log(x+1) transformed number of sequence reads
rich.16S	Pielou J evenness among bacteria using log(x+1) transformed number of sequence reads
reads.16S	Number of unique bacterial ASVs
Rhizob	Number of sequence 16S reads assigned to Rhizobia
Cyano	Number of sequence 16S reads assigned to Cyanobacteria
Nitrifying	Number of sequence 16S reads assigned to Nitrifying bacteria
LA	Leaf area in cm2
LBM	Leaf biomass in g
LMA	Leaf mass per area in mg per cm2
maxHeight	Maximum canopy height of crop during the growing season
earlyRGR	Relative Growth Rate using crop height measurement during the first 22 day of growht: = log(Height at 22 days) / 22 days
CropCover	Average vegetation ground cover of crops taken over the growing season using a modified Londo scale (see Methods)
WeedCover	Average vegetation ground cover of weeds taken over the growing season using a modified Londo scale (see Methods)
WinterCover.pct	Vegetation ground cover of crops taken in late fall post harvest using a modified Londo scale (see Methods)
ShootN.pct	Percent N in shoot tissues
ShootP.pct	Percent P in shoot tissues
standingP	Total crop biomass x percent P in shoots in g per m2
standingN	Total crop biomass x percent N in shoots in g per m2
POM_N	Particulate Organic Matter - Nitrogen content in g per kg
POM_C	Particulate Organic Matter - Carbon content in g per kg
POXC	Particulate Oxidizable Carbon in g per kg
pctSAS	Percent soil aggregate stability of sol aggregates between 1 and 2mm in size.

## Sheet: Data
PlotID	Field	Block	CCID	fgID	FieldPositionX	FieldPositionY	CoverCrop	NH4ppm	NO3ppm	SoilN.pct	SoilP.ppm	SoilK.meq	SoilC.pct	RootDen_gcm3	CropBM	WeedBM	reads.ITS	fungalRich	fungalEven	AMF	potential.pathogen	saprotroph	even.16S	rich.16S	reads.16S	Rhizob	Cyano	Nitrifying	LA	LBM	LMA	maxHeight	earlyRGR	CropCover	WeedCover	WinterCover.pct	ShootN.pct	ShootP.pct	standingP	standingN	POM_N	POM_C	POXC	pctSAS
F1B1CC01	F1	B1	CC1	Legume	68	9	Alfalfa	11.03	2.59	0.093	44	0.16	1.278	0.0119739	0.00464	0.2112	17296	182	0.734166	0	5517	5293	0.924319	1091	11616	371	18	198	2.45344	0.06	24.4555	17	0.0596554	5	66.25	17.5	NA	NA	NA	NA	0.32	4.74	259.25	61.21
F1B1CC02	F1	B1	CC2	Grass	16	0	AnnualRyegrass	7.04	4.59	0.095	36	0.13	1.252	0.00640887	0.03388	0.1744	12967	149	0.744732	12	1519	3972	0.929424	1247	14126	524	19	235	11.1193	0.17	15.2887	27	0.118329	28.75	25.625	32.5	1.28217	0.17	0.230384	0.434398	0.23	3.8	245.67	48
F1B1CC03	F1	B1	CC3	Legume	68	0	Galega	6.53	2.71	0.104	49	0.18	1.439	0.0023305	0	0.1932	13922	192	0.755724	53	3811	4382	0.93798	1371	15275	319	51	469	0	0	NA	17.6667	0.0679579	5	70	5	NA	NA	NA	NA	0.31	4.35	322.99	68.46
F1B1CC04	F1	B1	CC4	Brassica	52	0	BrownMustard	7.15	2.53	0.103	43	0.16	1.248	0.00253141	0.1876	0.2788	11139	121	0.696058	3	1115	3619	0.931872	810	6621	209	11	166	0	0	NA	100.333	0.099021	18.125	40	5	1.03201	0.14	1.05056	1.93604	0.23	3.18	262.49	56.94
F1B1CC05	F1	B1	CC5	Forb	4	9	Buckwheat	7.15	3.72	0.103	37	0.12	1.483	0.00431946	0.40592	0.0432	20014	174	0.75354	21	4124	4374	0.938018	1321	14811	417	10	399	48.9035	0.58	11.8601	116	0.131025	77.5	18.125	5	0.901713	0.22	3.5721	3.66023	0.35	4.83	313.28	58.41
F1B1CC06	F1	B1	CC6	Legume	80	0	CrimsonClover	7.83	2.6	0.091	49	0.14	1.126	0.00387747	0.022	0.254	14780	167	0.820067	34	3112	5779	0.929113	1083	12997	650	57	321	5.1446	0.0515389	10.0181	29	0.0403475	8.125	66.25	5	1.93135	0.16	0.1408	0.424897	0.28	3.65	248.81	65.84
F1B1CC07	F1	B1	CC7	Legume	36	0	FabaBean	9.35	4.47	0.094	45	0.21	1.291	0.00598697	0.0258	0.2976	12758	142	0.626579	17	904	3284	0.936516	1316	16128	390	122	385	16.4963	0.35	21.2169	49.3333	0.12214	5	51.25	5	3.39606	0.19	0.19608	0.876184	0.33	4	272.5	58.43
F1B1CC08	F1	B1	CC8	Legume	72	9	FieldPea	9.26	5.44	0.095	47	0.12	1.234	0.00516326	0.4242	0.068	13004	174	0.677803	61	2261	6777	0.937287	1414	18369	567	56	484	9.22831	0.15	16.2543	80.6667	0.125669	32.5	58.75	5	3.0931	0.18	3.05424	13.1209	0.24	3.4	282.44	66.67
F1B1CC09	F1	B1	CC9	Legume	44	9	HairyVetch	7.41	3.48	0.095	46	0.11	1.352	0.00331494	0.05236	0.1812	16904	179	0.755957	2	2746	6963	0.919706	1124	12767	666	80	119	7.49218	0.09	12.0125	38.6667	0.120904	21.25	36.875	92.5	4.58004	0.27	0.565488	2.39811	0.34	5.04	279.2	57.74
F1B1CC10	F1	B1	CC10	Grass	8	0	Oat	7.16	4.18	0.112	39	0.14	1.461	0.00518335	0.33668	0.0436	17755	186	0.711088	22	3741	5108	0.92818	1249	13394	704	56	285	22.7526	0.67	29.4471	81.3333	0.154533	51.25	18.125	5	1.04818	0.17	2.28942	3.52901	0.25	4.28	282.78	62.67
F1B1CC11	F1	B1	CC11	Brassica	48	0	OilseedRadish	4.94	3.15	0.093	46	0.16	1.208	0.00548471	0.10896	0.0448	11291	175	0.806887	96	2494	2635	0.935102	1201	13549	317	108	305	21.1225	1.04	49.2366	76	0.124522	55	18.125	17.5	1.39632	0.35	1.52544	1.52144	0.31	3.95	262.61	55.84
F1B1CC12	F1	B1	CC12	Grass	28	0	PearlMillet	9.55	3.25	0.105	40	0.15	1.325	0.00512308	0.06232	0.1592	13575	130	0.438154	8	558	9400	0.931886	1238	14009	477	38	385	8.32544	0.58	69.666	54	0.115607	11.875	40	5	0.951817	0.17	0.423776	0.593173	0.27	5.51	266.17	51.63
F1B1CC13	F1	B1	CC13	Forb	64	0	Phacelia	7.27	2.43	0.245	43	0.19	1.282	0.00287294	0.09012	0.2	11939	167	0.816709	121	1784	4522	0.935753	1113	11143	352	36	276	2.66694	0.03	11.2488	54.6667	0.107204	25	43.75	5	0.901613	0.24	0.865152	0.812533	0.32	4.49	266.15	72.77
F1B1CC14	F1	B1	CC14	Legume	20	0	RedClover	7.97	3.41	0.09	35	0.17	1.258	0.00198896	0.00288	0.3208	12637	111	0.623313	0	3211	2616	0.912148	1109	14345	882	17	211	4.00136	0.02	4.9983	13	0.049593	8.125	47.5	62.5	NA	NA	NA	NA	0.25	3.91	235.85	58.37
F1B1CC15	F1	B1	CC15	Grass	44	0	SorghumSudan	11.83	5.57	0.098	40	0.13	1.291	0.00311403	0.0534	0.3076	15283	148	0.654736	43	4092	6061	0.938812	1321	15473	391	13	388	9.7293	0.55	56.5303	58.6667	0.118986	8.125	44.375	5	1.0213	0.09	0.19224	0.545374	0.3	4.29	259.15	60.93
F1B1CC16	F1	B1	CC16	Forb	84	0	Sunflower	8.24	1.87	0.086	46	0.17	1.062	0.00355602	0.05692	0.116	11733	144	0.804213	107	3255	5171	0.936136	1206	15496	422	34	397	15.9019	0.43	27.0408	55	0.099021	8.125	62.5	5	0.657151	0.11	0.250448	0.37405	0.25	2.98	208.96	68.49
F1B1CC17	F1	B1	CC17	Grass	80	9	Teff	9.66	2.05	0.103	45	0.13	1.277	0.00393774	0.01756	0.2808	13225	159	0.809081	200	3475	5157	0.938165	1267	15699	298	31	495	3.59746	0.09	25.0177	67.3333	0.113458	14.375	58.75	5	1.16883	0.24	0.168576	0.205246	0.24	3.9	262.9	66.34
F1B1CC18	F1	B1	CC18	Brassica	72	0	TillageRadish	6.72	2.11	0.098	46	0.19	1.318	0.00972381	0.04788	0.0676	22442	178	0.786249	63	4489	5480	0.938977	1226	13882	372	66	488	28.4518	0.87	30.578	45.6667	0.114902	32.5	40	17.5	1.25221	0.27	0.517104	0.599559	0.31	4.07	266.23	71.97
F1B1CC19	F1	B1	CC19	Grass	8	9	Timothy	6.37	2.57	0.105	35	0.15	1.366	0.00791566	0	0.1748	11884	145	0.735256	0	2132	4440	0.934407	1383	15605	636	42	302	0	0	NA	54	0.10463	14.375	29.375	17.5	NA	NA	NA	NA	0.25	3.91	259.46	67.18
F1B1CC20	F1	B1	CC20	Legume	24	9	WhiteClover	6.23	2.12	0.098	36	0.13	1.318	0.00460073	0	0.2276	12161	167	0.777322	20	2815	3339	0.937077	1132	9902	206	20	256	0	0	NA	11.3333	0.0698256	5	44.375	5	NA	NA	NA	NA	0.32	5.09	262.42	56.64
F1B1CC23	F1	B1	CC23	Forb	4	0	HempAnka	8.6	5.34	0.107	32	0.15	1.485	0.0033953	0.09668	0.1652	15817	156	0.57449	10	5277	3501	0.921627	1048	9227	363	15	148	20.4779	0.57	27.8349	72	0.119634	17.5	44.375	5	1.03762	0.14	0.541408	1.00318	0.27	4.81	319.63	60.57
F1B1CC24	F1	B1	CC24	Forb	84	9	HempFerimon	11.99	2.48	0.099	44	0.15	1.191	0.00214969	0.066	0.1264	12512	112	0.841758	133	2083	5389	0.935753	1197	13203	366	101	370	8.26702	0.2	24.1925	80	0.115607	17.5	55	5	0.918569	0.15	0.396	0.606256	0.3	3.89	255.69	58.1
F1B2CC01	F1	B2	CC1	Legume	72	27	Alfalfa	8.41	3.45	0.118	50	0.25	1.597	0.0027524	0.00288	0.6036	13523	170	0.775805	31	2067	4209	0.934883	1164	12398	320	16	335	2.7516	0.02	7.2685	40	0.0618706	11.25	66.25	5	NA	NA	NA	NA	0.26	3.92	256.15	67.75
F1B2CC02	F1	B2	CC2	Grass	40	27	AnnualRyegrass	7.27	2.11	0.113	46	0.19	1.511	0.00208941	0.05396	0.3328	14649	130	0.838377	0	3393	5284	0.941581	1417	17827	431	38	389	4.0742	0.09	22.0902	42.3333	0.131025	28.75	40.625	47.5	1.39808	0.23	0.496432	0.754404	0.28	4.01	302.84	66.07
F1B2CC03	F1	B2	CC3	Legume	60	18	Galega	6.56	3.52	0.117	50	0.16	1.468	0.00327475	0.002	0.2704	20602	126	0.789385	168	2558	9063	0.933487	969	7563	241	32	127	4.46858	0.0324949	7.27185	13	0.0766399	5	73.75	5	NA	NA	NA	NA	0.28	4.24	289.23	69.18
F1B2CC04	F1	B2	CC4	Brassica	80	27	BrownMustard	8	2.65	0.116	56	0.22	1.638	0.00327475	0.1152	0.2772	10352	201	0.827432	110	1303	3113	0.937253	1272	15109	354	38	450	16.413	0.385598	23.4934	125.667	0.099021	28.75	58.75	5	1.47562	0.28	1.29024	1.69992	0.32	5.63	269.56	70.62
F1B2CC05	F1	B2	CC5	Forb	40	18	Buckwheat	8.56	2.51	0.117	49	0.13	1.532	0.00622806	0.56436	0.0432	19339	186	0.723215	0	2393	7769	0.927949	839	6057	308	3	92	28.1195	0.49	17.4257	126.333	0.138511	81.25	36.875	5	0.825778	0.26	5.86934	4.66036	0.32	6.23	306.48	66.23
F1B2CC06	F1	B2	CC6	Legume	52	27	CrimsonClover	8.79	3.07	0.109	51	0.17	1.45	0.00375693	0.03676	0.3208	14010	152	0.726313	8	5846	2691	0.928138	1313	17386	906	11	364	5.28424	0.09	17.0318	38.6667	0.0766399	8.125	58.75	5	1.71789	0.17	0.249968	0.631497	0.33	4.66	283.06	61.65
F1B2CC07	F1	B2	CC7	Legume	84	27	FabaBean	8.53	3.64	0.121	56	0.17	1.61	0.00797594	0.07688	0.3856	6659	183	0.829848	35	1193	2502	0.935255	1293	17075	595	21	382	8.21602	0.12	14.6056	76	0.118329	5	73.75	5	3.37724	0.2	0.61504	2.59642	0.32	6.43	279.8	72.63
F1B2CC08	F1	B2	CC8	Legume	72	18	FieldPea	8.49	6.47	0.099	49	0.15	1.379	0.00118534	0.8286	0.1916	18198	199	0.692525	0	2543	9977	0.922773	869	6991	508	29	74	11.4085	0.15	13.1481	85.3333	0.128955	40	48.125	5	3.11779	0.29	9.61176	25.834	0.41	6.16	286.23	67.62
F1B2CC09	F1	B2	CC9	Legume	32	18	HairyVetch	11.29	5.62	0.118	44	0.13	1.539	0.00174788	0.18656	0.1196	13975	174	0.659949	7	3482	4125	0.924501	844	6130	225	17	66	11.9036	0.14	11.7612	67.3333	0.100965	25.625	51.25	77.5	4.26638	0.37	2.76109	7.95936	0.3	6.35	330.46	62.05
F1B2CC10	F1	B2	CC10	Grass	64	27	Oat	8.29	2.48	0.107	53	0.15	1.441	0.00468109	0.45508	0.1988	15150	159	0.748251	11	2184	5078	0.928975	1127	13483	525	68	271	20.5364	0.47	22.8861	110.667	0.160347	40	36.875	5	0.880534	0.18	3.27658	4.00713	0.3	4.63	263.08	68.76
F1B2CC11	F1	B2	CC11	Brassica	60	27	OilseedRadish	7.41	3.14	0.12	51	0.14	1.536	0.0229635	0.41748	0.1028	17005	221	0.774956	61	2320	4874	0.938266	980	8062	192	14	212	61.9149	1.77	28.5876	121.333	0.125669	73.75	29.375	32.5	1.19959	0.33	5.51074	5.00807	0.22	4.93	273.03	68.59
F1B2CC12	F1	B2	CC12	Grass	4	27	PearlMillet	8.11	5.29	0.134	34	0.17	1.655	0.012657	0.13912	0.2816	10158	147	0.806093	32	1664	4558	0.939877	1332	15668	325	10	305	29.685	0.98	33.0133	96.6667	0.12679	28.75	48.125	5	1.01708	0.23	1.2799	1.41496	0.31	4.72	306.75	74.16
F1B2CC13	F1	B2	CC13	Forb	44	27	Phacelia	8.26	1.32	0.131	49	0.17	1.506	0.00231041	0.07512	0.3596	12201	147	0.728467	10	1697	2867	0.933083	1256	14595	604	33	331	3.83868	0.08	20.8405	61.6667	0.106362	43.75	40	5	0.8237	0.31	0.931488	0.618764	0.3	5.14	280.22	71.49
F1B2CC14	F1	B2	CC14	Legume	84	18	RedClover	7.73	4.19	0.102	49	0.18	1.482	0.00120543	0.00712	0.3272	9643	124	0.81938	23	2143	3003	0.930428	993	10121	249	102	213	14.7932	0.18	12.1677	32.6667	0.0467062	8.125	66.25	17.5	2.99478	NA	NA	0.213228	0.31	4.82	270.01	72.99
F1B2CC15	F1	B2	CC15	Grass	36	18	SorghumSudan	9.6	2.34	0.113	43	0.14	1.562	0.0035962	0.05176	0.2128	11178	169	0.70946	49	2732	5679	0.935704	1358	14976	382	172	321	18.4254	0.44	23.88	80	0.111208	14.375	58.75	5	0.900739	0.13	0.269152	0.466223	0.24	4.26	283.53	65.17
F1B2CC16	F1	B2	CC16	Forb	8	27	Sunflower	8.98	2.52	0.12	41	0.17	1.671	0.0161126	0.23052	0.4064	14070	115	0.814589	92	3026	3690	0.937168	1134	10489	226	8	218	36.8551	2.43	65.934	112.333	0.118329	21.875	51.25	5	0.720778	0.12	1.1065	1.66154	0.3	4.45	317.26	72.17
F1B2CC17	F1	B2	CC17	Grass	8	18	Teff	7.37	3.12	0.126	37	0.12	1.651	0.00375693	0.12996	0.1948	15795	140	0.336697	6	1427	1192	0.936166	1121	9980	376	27	185	3.04916	0.19	62.3122	71	0.118329	14.375	55	17.5	0.897023	0.23	1.19563	1.16577	0.22	4	320.74	72.96
F1B2CC18	F1	B2	CC18	Brassica	4	18	TillageRadish	6.42	3.95	0.135	35	0.17	1.839	0.0171774	0.15128	0.17	13066	167	0.715608	13	2579	2634	0.937857	1197	11706	295	16	256	43.4623	1.82	41.8753	54.6667	0.115607	55	29.375	32.5	1.04248	0.24	1.45229	1.57706	0.28	3.99	323.81	73.6
F1B2CC19	F1	B2	CC19	Grass	20	27	Timothy	8.8	3.31	0.126	46	0.16	1.685	0.00309394	0.00124	0.2808	10734	170	0.873001	90	2579	3726	0.938248	1389	18346	454	41	519	2.295	0.01	4.3573	56.3333	0.0926624	14.375	63.125	5	NA	NA	NA	NA	0.27	5.02	323.79	71.57
F1B2CC20	F1	B2	CC20	Legume	56	18	WhiteClover	7.33	6.19	0.117	46	0.18	1.5	0.00188851	0.00596	0.1676	15596	128	0.787087	0	2339	7381	0.944887	749	4463	156	19	100	5.81464	0.09	15.4782	19.3333	0.0368186	5	73.75	5	NA	NA	NA	NA	0.31	4.8	319.58	69.03
F1B2CC23	F1	B2	CC23	Forb	68	18	HempAnka	7.83	3.23	0.115	49	0.19	1.557	0.00287294	0.0812	0.206	10182	131	0.851413	38	2004	3773	0.932945	1231	12953	413	63	249	13.6244	0.4	29.3591	104.333	0.123346	15	73.75	5	0.949288	0.22	0.71456	0.770822	0.25	5.8	286.02	69.21
F1B2CC24	F1	B2	CC24	Forb	16	18	HempFerimon	8.19	2.65	0.144	36	0.14	1.549	0.00351584	0.05092	0.0968	10550	108	0.764111	25	2350	5515	0.925231	888	8354	489	58	91	21.3634	0.33	15.447	73.6667	0.119634	21.25	51.25	5	0.925825	0.21	0.427728	0.47143	0.34	6.06	356.66	58.09
F2B3CC01	F2	B3	CC1	Legume	68	9	Alfalfa	6.44	9	0.168	13	0.09	2.159	0.00214969	0.0248	0.098	24254	231	0.685131	22	8332	6554	0.9266	1094	12313	639	58	189	1.4955	0.01	6.68673	24	0.066014	14.375	11.875	32.5	2.52078	0.26	0.25792	0.625154	0.38	6.2	614.31	46.84
F2B3CC02	F2	B3	CC2	Grass	36	9	AnnualRyegrass	13.31	4.13	0.176	13	0.08	2.202	0.000904073	0.21276	0.2716	NA	NA	NA	NA	NA	NA	0.941896	1051	10103	271	86	158	8.8126	0.19	21.56	49.6667	0.128955	66.25	15.625	47.5	1.60401	0.23	1.95739	3.41268	0.44	7.12	571.78	56.89
F2B3CC03	F2	B3	CC3	Legume	56	0	Galega	7.08	5.17	0.155	9	0.07	2.106	0.000984435	0.00804	0.2856	NA	NA	NA	NA	NA	NA	0.936887	936	8621	328	47	126	13.8289	0.11	7.95436	18.6667	0.066014	5	23.125	5	1.64618	NA	NA	0.132353	0.36	5.53	542.35	57.19
F2B3CC04	F2	B3	CC4	Brassica	76	9	BrownMustard	6.69	6.29	0.163	12	0.07	2.026	0.00220996	0.0472	0.084	NA	NA	NA	NA	NA	NA	0.949253	786	5333	87	17	160	16.8282	0.396234	23.5458	71	0.0853219	18.75	8.125	5	0.867961	0.16	0.30208	0.409678	0.49	8.52	561.67	45.56
F2B3CC05	F2	B3	CC5	Forb	36	0	Buckwheat	5.62	8.85	0.189	13	0.1	2.444	0.00124561	0.573958	0	18502	150	0.605028	0	7529	1522	0.908755	666	6426	398	6	49	31.5795	0.59	18.683	114.333	0.13584	85	5	5	1.24926	0.2	4.59166	7.17021	0.42	7.99	535.71	67.06
F2B3CC06	F2	B3	CC6	Legume	48	9	CrimsonClover	9.49	7.49	0.215	13	0.11	2.481	0.00357611	0.1254	0.524	7650	138	0.685065	1	1941	2434	0.927779	770	6541	227	13	72	6.19096	0.05	8.07629	54	0.0766399	55	23.125	5	2.44031	0.23	1.15368	3.06015	0.37	5.37	599.32	57.44
F2B3CC07	F2	B3	CC7	Legume	80	9	FabaBean	12.57	9.46	0.154	14	0.08	1.869	0.00620797	0.07112	0.36	NA	NA	NA	NA	NA	NA	0.94113	884	6995	127	109	123	18.2735	0.28	15.3228	76	0.116987	14.375	23.125	5	3.63081	0.44	1.25171	2.58223	0.34	4.93	520.79	47.98
F2B3CC08	F2	B3	CC8	Legume	68	0	FieldPea	6.53	6.48	0.156	10	0.06	1.927	0.000964345	0.44328	0.118	10766	162	0.699024	1	4062	2082	0.9145	890	10799	893	66	61	8.78078	0.12	13.6662	67.3333	0.12214	43.75	5	17.5	3.04476	0.23	4.07818	13.4968	0.24	4.85	498.48	60.54
F2B3CC09	F2	B3	CC9	Legume	28	0	HairyVetch	6.03	11.12	0.164	11	0.07	2.11	0.00040181	0.0778	0.418	NA	NA	NA	NA	NA	NA	0.910995	688	6347	291	6	34	13.1316	0.15	11.4229	72.6667	0.108033	8.125	33.125	17.5	4.86625	0.48	1.49376	3.78594	0.46	7.22	533.44	70.09
F2B3CC10	F2	B3	CC10	Grass	60	9	Oat	8.6	5.39	0.18	14	0.09	2.052	0.000803621	0.4368	0.0152	15082	212	0.755797	6	5003	3475	0.945373	882	6888	192	79	131	32.0486	0.9	28.0824	91.3333	0.149309	43.75	5	5	0.703913	0.21	3.66912	3.07469	0.37	8.39	569.17	70.89
F2B3CC11	F2	B3	CC11	Brassica	56	9	OilseedRadish	14.12	5.38	0.187	13	0.09	2.168	0.00751385	0.05912	0.1452	1598	60	0.658117	0	593	209	0.935991	889	6721	192	32	83	18.4021	0.68	36.9524	94	0.115607	55	15.625	17.5	1.31379	0.26	0.614848	0.77671	0.39	6.41	572.06	71.03
F2B3CC12	F2	B3	CC12	Grass	24	9	PearlMillet	9.17	6.97	0.236	16	0.09	2.258	0.00156706	0.2712	0.6244	16369	130	0.67145	6	6213	1552	0.934184	861	7466	204	149	132	30.7616	0.8	26.0064	80	0.0948776	21.875	23.125	5	1.56229	0.26	2.82048	4.23693	0.4	7.36	536.18	75.12
F2B3CC13	F2	B3	CC13	Forb	40	9	Phacelia	6.75	3.22	0.186	11	0.07	2.258	4.02e-05	0.34368	0.12	15578	99	0.374774	0	756	3268	0.915529	778	6489	458	6	90	18.2871	0.32	17.4987	72.3333	0.0926624	40	5	5	1.506	0.2	2.74944	5.17583	0.39	6.63	512.81	73.39
F2B3CC14	F2	B3	CC14	Legume	80	0	RedClover	8.08	6.93	0.169	11	0.06	1.869	0.00112507	0.06252	0.432	NA	NA	NA	NA	NA	NA	0.933412	985	11019	266	12	216	12.2321	0.13	10.6278	32.6667	0.0368186	11.875	23.125	47.5	3.44189	0.27	0.675216	2.15187	0.27	3.95	518.82	60.45
F2B3CC15	F2	B3	CC15	Grass	32	0	SorghumSudan	5.54	6.56	0.176	12	0.08	2.178	0.00502263	0.48912	0.2248	6680	121	0.635814	0	1938	1120	0.930197	777	6566	281	9	84	45.0512	1.48	32.8515	149.667	0.118329	25	23.125	17.5	1.05492	0.18	3.52166	5.15983	0.53	8.93	517.04	74.69
F2B3CC16	F2	B3	CC16	Forb	20	9	Sunflower	13.42	3.38	0.204	14	0.09	2.304	0.0191061	0.90892	0.4504	10817	132	0.771134	2	3062	1869	0.935181	1011	11844	398	42	265	159.385	4.73	29.6766	152.667	0.116987	NA	NA	5	1.11543	0.22	7.9985	10.1383	0.44	9.42	602.93	68.5
F2B3CC17	F2	B3	CC17	Grass	4	0	Teff	8.68	7.35	0.183	14	0.08	2.167	0.00349575	0.09036	0.2684	13131	179	0.737183	0	2359	3586	0.934173	776	6782	229	14	106	6.90028	0.19	27.5351	109.333	0.100965	8.125	33.125	5	1.36599	0.28	1.01203	1.2343	0.55	8.26	538.21	75.18
F2B3CC18	F2	B3	CC18	Brassica	84	9	TillageRadish	9.09	5.19	0.154	16	0.08	1.843	0.019307	0.27184	0.0848	11055	126	0.538441	0	1098	191	0.93704	1050	11940	347	111	171	31.5293	1.36	43.1345	63.6667	0.106362	19.375	14.375	17.5	1.49474	0.3	3.26208	4.06331	0.42	7.72	519.05	47.98
F2B3CC19	F2	B3	CC19	Grass	8	9	Timothy	6.67	6.97	0.185	13	0.07	2.24	0.00100453	0.00912	0.3788	10437	173	0.754552	3	1783	2951	0.914995	701	5608	168	24	82	3.47314	0.08	23.0339	69.3333	0.0853219	5	29.375	17.5	1.57929	NA	NA	0.144031	0.42	5.65	524.84	70.35
F2B3CC20	F2	B3	CC20	Legume	52	0	WhiteClover	6.67	4.6	0.162	9	0.05	2.013	0.000622806	0.00312	0.3976	14902	135	0.738385	0	2626	6324	0.932733	1070	12998	381	257	200	5.81098	0.08	13.767	19.3333	0.0136991	5	23.125	5	NA	NA	NA	NA	0.31	5.11	529.47	59.69
F2B3CC23	F2	B3	CC23	Forb	64	0	HempAnka	7.7	3.8	0.145	9	0.08	1.862	0.00164742	0.18016	0.1536	NA	NA	NA	NA	NA	NA	0.929884	993	10529	459	89	110	14.5031	0.44	30.3383	95.6667	0.106362	32.5	8.125	5	1.20703	0.19	1.36922	2.17459	0.33	5.32	467.44	55.78
F2B3CC24	F2	B3	CC24	Forb	16	0	HempFerimon	6.6	5.19	0.182	13	0.09	2.243	0.00548471	0.59564	0.2676	NA	NA	NA	NA	NA	NA	0.931213	763	6538	217	12	75	61.7664	1.21	19.5899	143.333	0.108033	47.5	8.125	5	1.35204	0.21	5.00338	8.05331	0.57	9.18	560.85	68.93
F2B4CC01	F2	B4	CC1	Legume	40	18	Alfalfa	8.73	9.02	0.171	14	0.07	2.06	0.00450028	0.03532	0.2068	22118	160	0.750176	0	3099	4799	0.918165	681	5684	538	9	45	4.0637	0.03	7.38243	49.6667	0.0618706	51.25	23.125	32.5	2.6956	0.29	0.409712	0.952087	0.43	6.29	596.84	53.09
F2B4CC02	F2	B4	CC2	Grass	4	18	AnnualRyegrass	8.41	5.64	0.193	13	0.1	2.261	0.0063486	0.2176	0.1224	27557	187	0.708798	0	3140	13585	0.935801	915	8719	420	20	100	6.43624	0.2	31.074	62.3333	0.127885	62.5	15.625	62.5	1.87803	0.26	2.26304	4.0866	0.57	9.5	581.05	59.51
F2B4CC03	F2	B4	CC3	Legume	76	27	Galega	6.27	6.86	0.134	21	0.08	1.673	0.00598697	0.00224	0.3988	25311	168	0.741766	37	4853	7210	0.935065	611	4364	150	2	45	7.78803	0.06	7.70413	36	0.12214	44.375	26.875	5	NA	NA	NA	NA	0.44	7.86	561.53	20.67
F2B4CC04	F2	B4	CC4	Brassica	68	18	BrownMustard	5.96	8.84	0.156	16	0.07	1.935	0.00335512	0.0312	0.1496	NA	NA	NA	NA	NA	NA	0.941245	841	8100	182	45	101	25.9993	0.631185	24.277	100.667	0.102833	11.25	36.875	5	0.91621	0.25	0.312	0.285857	0.41	5.3	571.98	36.03
F2B4CC05	F2	B4	CC5	Forb	72	18	Buckwheat	6.32	6.17	0.152	17	0.07	1.888	0.00590661	0.6512	0.0976	16077	193	0.808332	0	3903	1682	0.935382	923	9025	308	29	169	21.1567	0.352397	16.6565	125.333	0.13301	36.25	11.25	5	1.04712	0.22	5.73056	6.81883	0.39	6.34	545.34	45.08
F2B4CC06	F2	B4	CC6	Legume	4	27	CrimsonClover	8.79	7.49	0.179	13	0.07	2.064	0.00200905	0.2238	0.252	5755	140	0.617203	3	2564	1132	0.904319	559	3793	391	0	36	19.3546	0.15	7.7501	63	0.0853219	40	51.25	5	2.58016	0.26	2.32752	5.77441	0.48	10.2	584.16	56.6
F2B4CC07	F2	B4	CC7	Legume	52	18	FabaBean	9.5	5.53	0.155	16	0.08	1.869	0.00218987	0.05748	0.2372	30186	186	0.793656	65	8262	3932	0.934137	692	4782	285	14	53	9.9201	0.17	17.1369	75.6667	0.119634	11.25	21.875	5	3.62962	0.28	0.643776	2.0863	0.4	5.32	556.05	46.18
F2B4CC08	F2	B4	CC8	Legume	40	27	FieldPea	9.66	10.78	0.16	15	0.07	1.79	0.00311403	0.5492	0.2772	21930	186	0.69553	0	7930	4723	0.898002	655	5817	457	2	32	6.40022	0.113504	17.7345	88.3333	0.125669	23.125	33.125	17.5	2.96984	0.28	6.15104	16.3104	0.34	5.5	493.83	52.62
F2B4CC09	F2	B4	CC9	Legume	8	18	HairyVetch	8.07	8.46	0.191	11	0.07	2.313	0.00118534	0.14356	0.2316	14029	124	0.511379	0	821	5143	0.91846	749	7223	385	17	69	5.62202	0.09	16.0085	79.6667	0.10463	47.5	25.625	32.5	4.67173	0.38	2.18211	6.70673	0.43	5.98	530.02	63.38
F2B4CC10	F2	B4	CC10	Grass	16	18	Oat	11.73	7.77	0.192	12	0.06	2.192	0.00701159	1.18128	0.05	20379	242	0.777547	8	3339	4027	0.929975	1006	10983	397	13	136	36.1645	0.72	19.909	110.667	0.16143	29.375	11.25	5	1.0243	0.18	8.50522	12.0998	0.4	6.54	543.65	70.63
F2B4CC11	F2	B4	CC11	Brassica	84	18	OilseedRadish	13.74	4.78	0.16	23	0.07	2.031	0.00245104	0.62432	0.0648	11299	72	0.194256	2	419	263	0.93714	735	5134	239	1	34	34.8048	0.98	28.1571	103.333	0.119634	81.25	11.25	5	1.22421	0.26	6.49293	7.64297	0.55	8.45	511.7	43.65
F2B4CC12	F2	B4	CC12	Grass	64	27	PearlMillet	6.1	7.62	0.133	20	0.07	1.705	0.00180815	0.00932	0.2804	18193	165	0.714919	0	3915	4381	0.939641	864	8620	236	21	122	4.18417	0.23	54.9691	39.3333	0.11272	44.375	15.625	5	1.3865	NA	NA	0.129221	0.35	5.7	494.21	21.43
F2B4CC13	F2	B4	CC13	Forb	56	18	Phacelia	6.59	5.17	0.145	17	0.07	1.78	0.0010648	0.2788	0.1456	14543	168	0.746167	0	3596	3593	0.9268	1075	11366	848	17	131	0	0	NA	94.3333	0.099021	19.375	18.125	5	1.05568	0.22	2.45344	2.94325	0.35	4.75	553.07	50.78
F2B4CC14	F2	B4	CC14	Legume	48	27	RedClover	9.86	7.34	0.14	20	0.07	1.599	0.0023305	0.01768	0.4916	18450	182	0.782594	33	4849	2760	0.913074	753	6220	552	18	24	16.2269	0.22	13.5577	50.6667	0.0618706	55	33.125	47.5	3.34963	0.22	0.155584	0.592214	0.28	3.36	470.59	43.86
F2B4CC15	F2	B4	CC15	Grass	68	27	SorghumSudan	4.69	7.16	0.123	19	0.08	1.521	0.00560525	0.03868	0.2352	17074	171	0.689698	0	10323	2860	0.935426	845	8500	396	18	51	6.57846	0.67	101.848	83.6667	0.119634	21.875	25.625	5	1.25347	0.42	0.649824	0.484843	0.3	5.61	490.4	25.4
F2B4CC16	F2	B4	CC16	Forb	76	18	Sunflower	7.39	4.79	0.149	21	0.1	1.884	0.0061477	0.33796	0.1256	23617	190	0.704711	209	3132	2435	0.932964	866	7323	266	13	124	32.2897	2.09	64.7266	130.667	0.116987	66.25	21.875	5	1.05042	0.28	3.78515	3.55	0.47	5.96	546.51	43.47
F2B4CC17	F2	B4	CC17	Grass	56	27	Teff	5.13	6.13	0.134	22	0.07	1.693	0.00823711	0.05204	0.1	15739	196	0.763938	36	2882	1315	0.944202	966	8472	109	62	128	1.88226	0.21	111.568	75.3333	0.108033	47.5	18.75	17.5	0.928569	0.3	0.62448	0.483228	0.31	7.8	515.75	34.8
F2B4CC18	F2	B4	CC18	Brassica	80	18	TillageRadish	7.84	5.91	0.153	23	0.1	1.963	0.0128177	0.3362	0.1468	22495	113	0.227027	0	1313	424	0.930984	958	10101	452	43	138	35.5325	2.05	57.6937	130.667	0.118329	33.125	18.75	17.5	1.58523	0.35	4.7068	5.32953	0.46	8.05	540.62	39.12
F2B4CC19	F2	B4	CC19	Grass	48	18	Timothy	5.96	6.94	0.166	18	0.09	1.898	0.00253141	0.00952	0.2596	11790	200	0.754401	14	3707	2164	0.940313	645	4329	105	7	72	3.90704	0.18	46.0707	51.3333	0.0826	36.875	19.375	17.5	1.51321	NA	NA	0.144058	0.28	5.52	563.74	42.39
F2B4CC20	F2	B4	CC20	Legume	44	27	WhiteClover	7.7	6.78	0.139	19	0.06	1.693	0.00114516	0.02092	0.5428	12846	155	0.785219	24	2601	2629	0.922263	613	4274	351	5	48	7.53828	0.13	17.2453	23	0.024325	25	26.875	17.5	3.10434	0.28	0.234304	0.649427	0.42	8.44	535.69	32.98
F2B4CC23	F2	B4	CC23	Forb	16	27	HempAnka	10.45	7.8	0.166	20	0.07	1.876	0.00827729	0.67664	0.1164	14346	198	0.755919	3	2410	4453	0.930102	955	10288	431	13	130	31.85	0.96	30.1413	189.333	0.123346	29.375	43.75	5	1.16195	0.26	7.03706	7.86219	0.36	7.37	529.82	54.21
F2B4CC24	F2	B4	CC24	Forb	32	27	HempFerimon	8.16	7.76	0.146	15	0.06	1.776	0.00524363	0.06244	0.156	15013	180	0.811161	56	4052	2863	0.931182	925	9021	491	21	105	3.98542	0.21	52.6921	83.6667	0.120904	58.75	11.875	5	1.37149	0.5	1.2488	0.856358	0.33	5.44	513.57	45.04
